# Supplementary material for: Elucidating the role of metal ions in carbonic anhydrase catalysis
Source: PubMed Central journal article supplement (PMC7486293; doi:10.1038/s41467-020-18425-5), 2020-09-11
Supplement: 41467_2020_18425_MOESM1_ESM.pdf [file 41467_2020_18425_MOESM1_ESM.pdf]

## Supplementary Information

### Elucidating the role of metal ions in carbonic anhydrase catalysis

J. K. Kim *et al.*

#### **This PDF file includes:**

Supplementary Figure 1 -  $\text{HCO}_3^-$  binding geometry in Zn-, Co-, Ni-CA II.

Supplementary Figure 2 - Substrate binding in Zn-CA II at pH 7.8 and 11.0.

Supplementary Figure 3 - Product binding in Ni-CA II at pH 7.8 and 11.0.

Supplementary Figure 4 - Absorbance of Apo- & Zn-CA II in esterase kinetic assay at pH 7.8

Supplementary Figure 5 - Partial occupancy determination of His64 in CA II structures.

Supplementary Table 1 - Data collection and refinement statistics for the CA II structures.

Supplementary Table 2 - List of key bound water molecules in the CA II structures.

Supplementary Table 3 - Distance geometry in the CA II structures.

Supplementary References

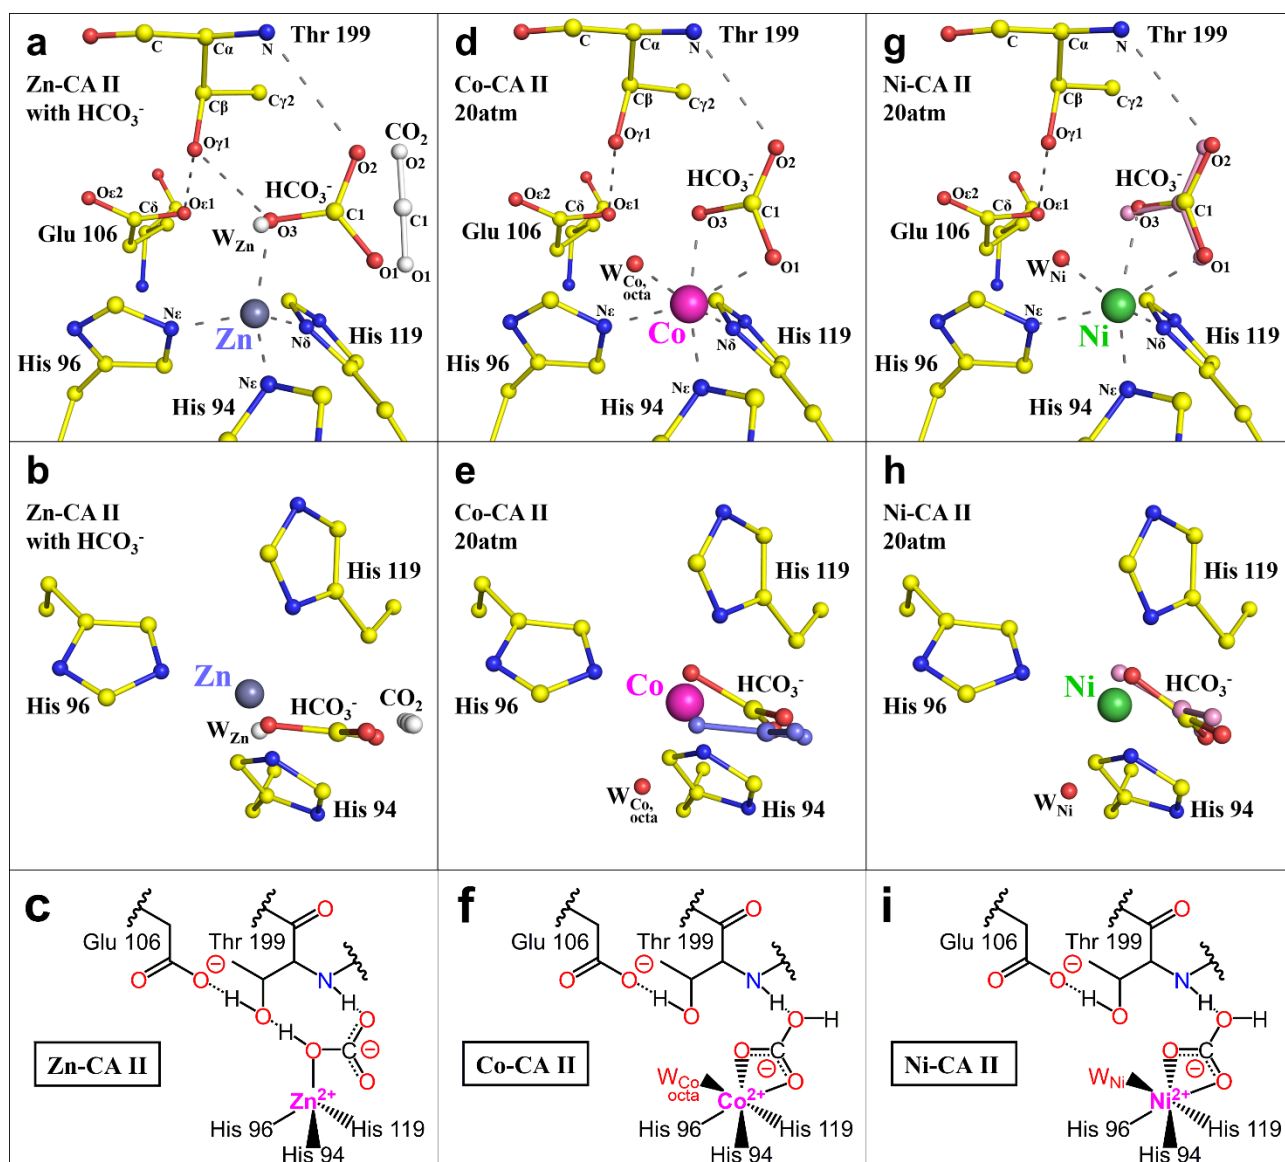

**Supplementary Fig. 1. HCO<sub>3</sub><sup>-</sup> binding geometry in Zn-, Co-, Ni-CA II.** **a-c)** Monodentate binding of HCO<sub>3</sub><sup>-</sup> in Zn-CA II (PDB code: 2vvb)<sup>1</sup>. The CO<sub>2</sub> molecule and W<sub>Zn</sub> (white) from Zn-CA II 20atm are superimposed for comparison. Note that HCO<sub>3</sub><sup>-</sup> lies on the plane made by the CO<sub>2</sub> molecule and W<sub>Zn</sub>. **d-f)** Bidentate binding of HCO<sub>3</sub><sup>-</sup> in Co-CA II 20atm pH 7.8. The HCO<sub>3</sub><sup>-</sup> molecule from Zn-CA II (light purple, PDB 2vvb) is superimposed for comparison. Note that the HCO<sub>3</sub><sup>-</sup> molecule in Co-CA II is tilted by ~ 31° to the HCO<sub>3</sub><sup>-</sup> molecule in Zn-CA II. **g-i)** Bidentate binding of HCO<sub>3</sub><sup>-</sup> in Ni-CA II 20atm. The HCO<sub>3</sub><sup>-</sup> molecule in Co-CA II (pink) is superimposed for comparison.

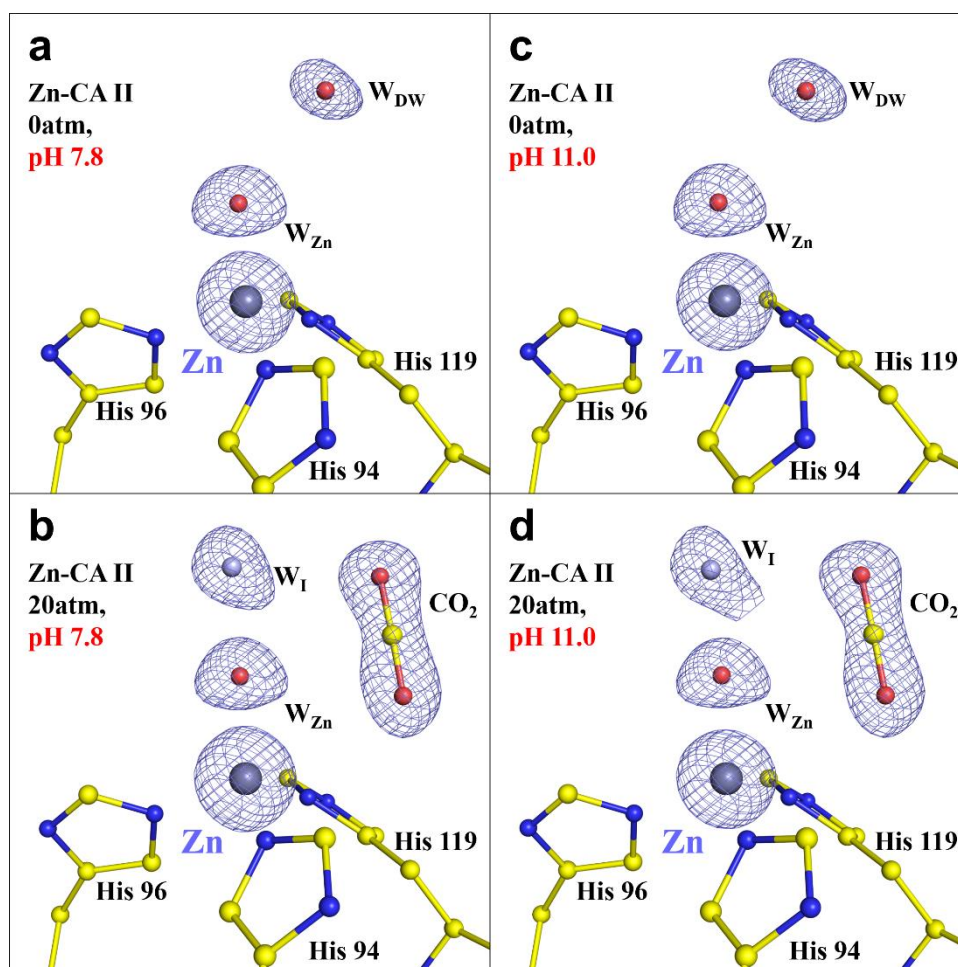

**Supplementary Fig. 2. Substrate binding in Zn-CA II at pH 7.8 (a-b) and 11.0 (c-d).** The metal coordination maintains tetrahedral geometry upon CO<sub>2</sub> binding regardless of pH values. The electron density ( $2F_o - F_c$ , blue) is contoured at  $2.2\sigma$ . The intermediate water ( $W_I$ ) is colored in steel blue for clarity.

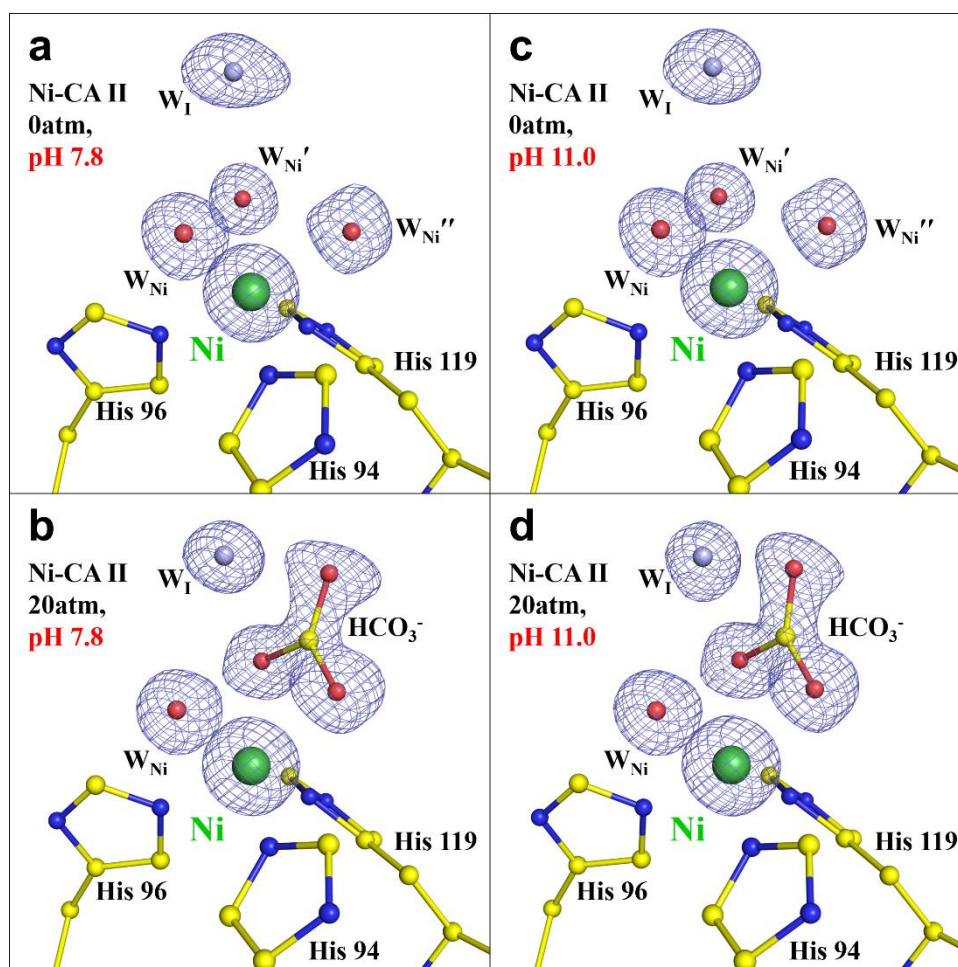

**Supplementary Fig. 3. Product binding in Ni-CA II at pH 7.8 (a-b) and 11.0 (c-d).** The metal coordination maintains octahedral geometry upon  $HCO_3^-$  binding regardless of pH values. The intermediate water ( $W_I$ ) is colored in steel blue for clarity. The electron density ( $2F_o-F_c$ , blue) is contoured at  $2.2\sigma$ .

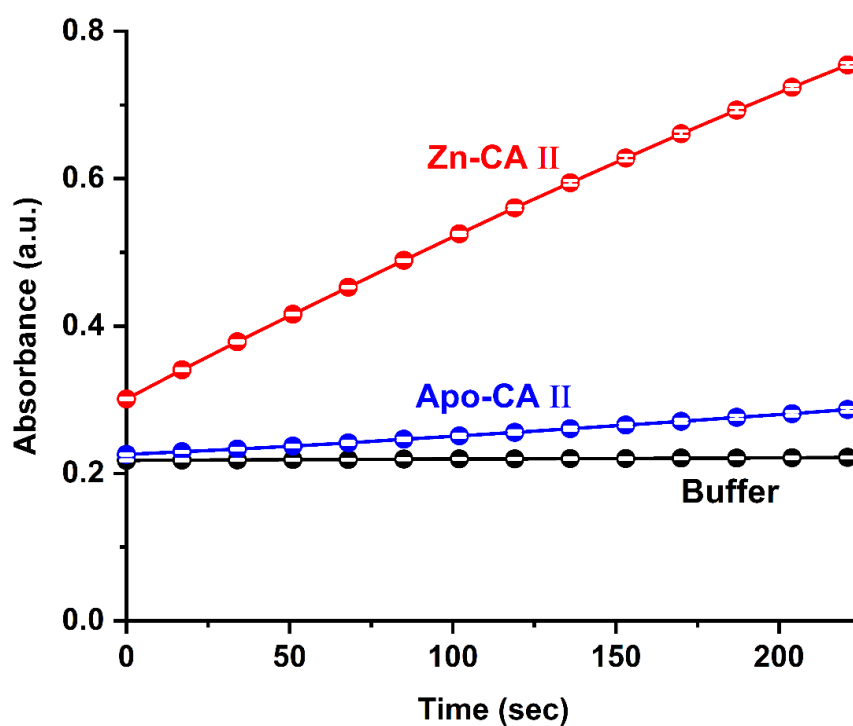

**Supplementary Fig. 4. Absorbance of Apo- and Zn-CA II in esterase kinetic assay at pH 7.8.**

CA II esterase activity was measured spectroscopically at 348nm, indicative of substrate 4-nitrophenyl acetate hydrolysis. Compared to Zn-CA II, Apo-CA II and buffer show little to no esterase activity. The standard deviation errors (white) are presented in the data points and are ranging from 0.2 % ~ 1.1 %. Source data are provided as a Source Data file.

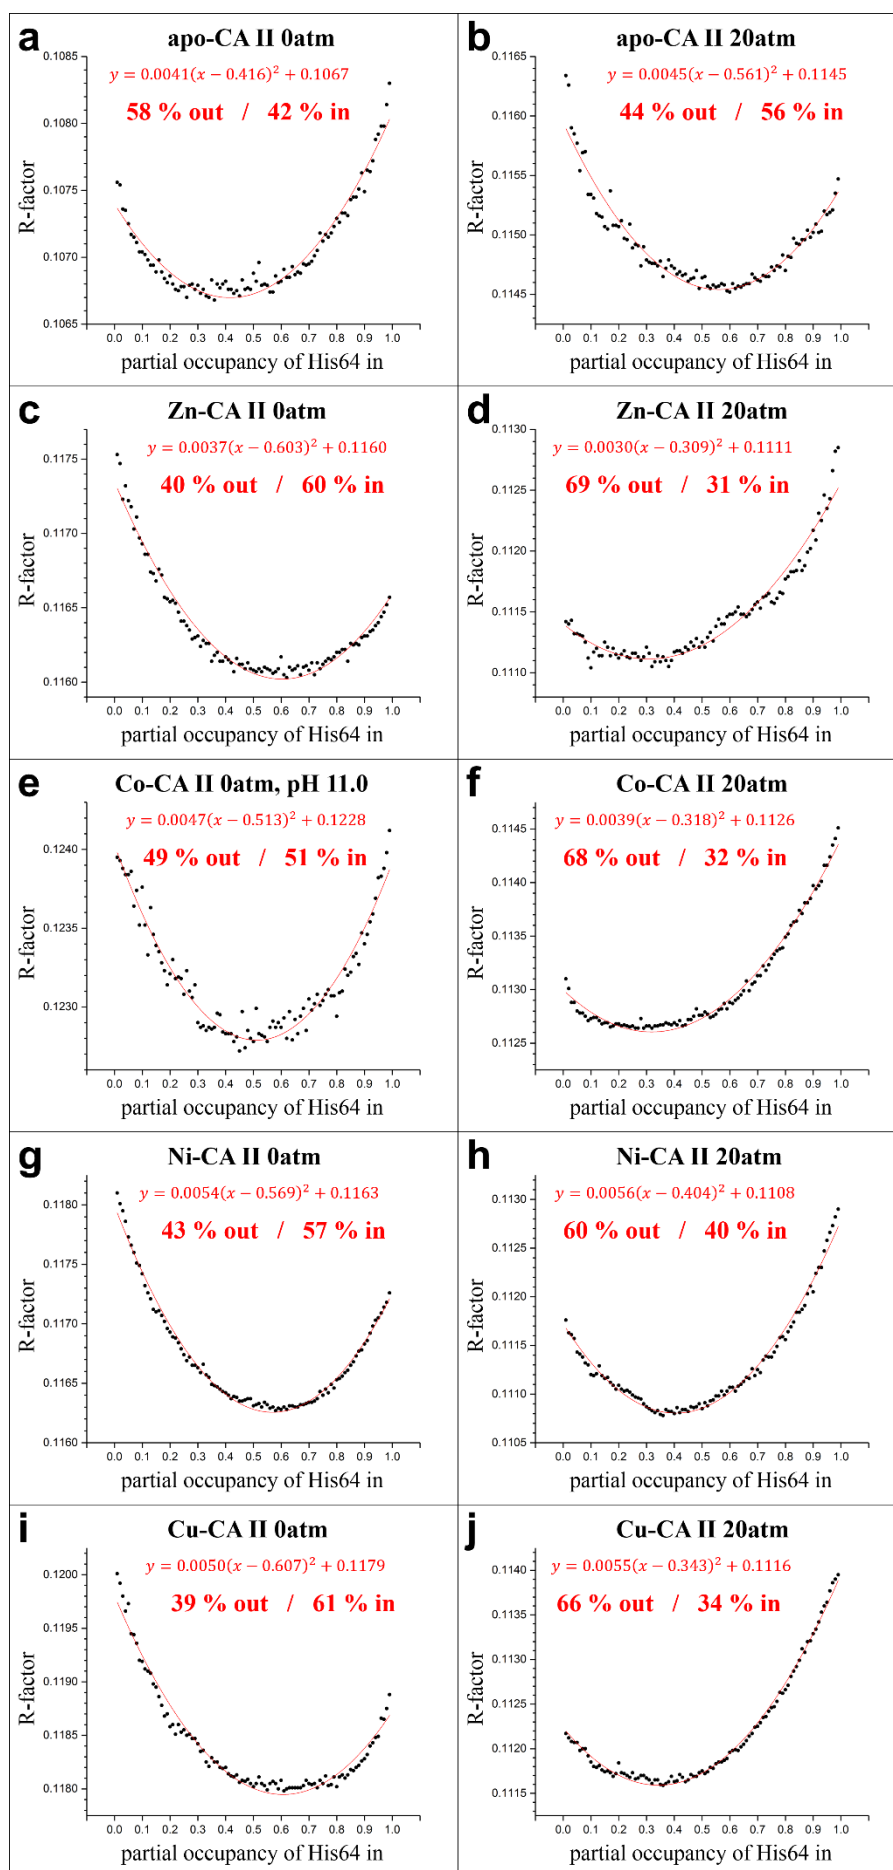

**Supplementary Fig. 5.** See next page for figure caption.

**Supplementary Fig. 5. Partial occupancy determination of His64.** The His64 out/in conformations are determined for the selected structures of apo-CA II (**a, b**) Zn-CA II (**c, d**), Co-CA II (**e, f**), Ni-CA II (**g, h**) Cu-CA II (**i, j**). For each data set, systematic refinements were carried out on 99 structures with manually adjusted His64 in/out occupancies. The obtained data points were then fitted to quadratic functions, showing the minimum points in the overall R factors. The His64 out/in conformations for the other structures can be found in Supplementary Table 1. Source data are provided as a Source Data file.

**Supplementary Table 1. Data collection and refinement statistics for the CA II structures.**

|                                         | apo-CA II<br>0atm<br>6LUU          | apo-CA II<br>20atm<br>6LUV                                                                       | Zn-CA II<br>0atm<br>6LUW  | Zn-CA II<br>20atm<br>6LUX                                                                        | Zn-CA II<br>0atm<br>pH11.0<br>6LUY | Zn-CA II<br>20atm<br>pH11.0<br>6LUZ                                                             | Co-CA II<br>0atm<br>6LV1                                          | Co-CA II<br>20atm<br>6LV2                                                                               |
|-----------------------------------------|------------------------------------|--------------------------------------------------------------------------------------------------|---------------------------|--------------------------------------------------------------------------------------------------|------------------------------------|-------------------------------------------------------------------------------------------------|-------------------------------------------------------------------|---------------------------------------------------------------------------------------------------------|
| <b>Data collection</b>                  |                                    |                                                                                                  |                           |                                                                                                  |                                    |                                                                                                 |                                                                   |                                                                                                         |
| Space group                             | $P2_1$                             | $P2_1$                                                                                           | $P2_1$                    | $P2_1$                                                                                           | $P2_1$                             | $P2_1$                                                                                          | $P2_1$                                                            | $P2_1$                                                                                                  |
| Cell dimensions                         |                                    |                                                                                                  |                           |                                                                                                  |                                    |                                                                                                 |                                                                   |                                                                                                         |
| $a, b, c$ (Å)                           | 42.13,<br>41.30,<br>72.21          | 42.26,<br>41.38,<br>72.00                                                                        | 42.21,<br>41.28,<br>72.15 | 42.37,<br>41.44,<br>72.13                                                                        | 42.28,<br>41.26,<br>72.07          | 42.39,<br>41.47,<br>72.15                                                                       | 42.31,<br>41.22,<br>72.05                                         | 42.32,<br>41.32,<br>72.22                                                                               |
| $\beta$ (°)                             | 104.27                             | 104.18                                                                                           | 104.18                    | 104.05                                                                                           | 104.19                             | 104.11                                                                                          | 104.16                                                            | 104.03                                                                                                  |
| Resolution (Å)                          | 30-1.20<br>(1.22-1.20)             | 30-1.20<br>(1.22-1.20)                                                                           | 30-1.20<br>(1.22-1.20)    | 30-1.20<br>(1.22-1.20)                                                                           | 30-1.20<br>(1.22-1.20)             | 30-1.20<br>(1.22-1.20)                                                                          | 30-1.20<br>(1.22-1.20)                                            | 30-1.20<br>(1.22-1.20)                                                                                  |
| $R_{\text{sym}}$ (%)                    | 5.8 (36.8)                         | 7.1 (48.1)                                                                                       | 6.5 (37.6)                | 6.8 (66.9)                                                                                       | 8.5 (17.7)                         | 5.6 (20.3)                                                                                      | 9.2 (60.7)                                                        | 8.2 (65.6)                                                                                              |
| $I/\sigma(I)$                           | 28.8 (6.8)                         | 21.2 (5.1)                                                                                       | 29.7 (6.3)                | 29.8 (3.6)                                                                                       | 25.2 (12.7)                        | 29.9 (11.8)                                                                                     | 24.3 (3.2)                                                        | 20.1 (3.8)                                                                                              |
| Completeness (%)                        | 95.5 (92.6)                        | 94.3 (91.2)                                                                                      | 98.8 (97.5)               | 96.2 (92.9)                                                                                      | 98.0 (96.0)                        | 94.6 (91.9)                                                                                     | 96.0 (93.3)                                                       | 98.4 (96.4)                                                                                             |
| Redundancy                              | 7.5 (7.3)                          | 7.5 (7.4)                                                                                        | 7.3 (7.1)                 | 7.4 (7.3)                                                                                        | 7.4 (7.4)                          | 7.6 (7.5)                                                                                       | 7.6 (7.6)                                                         | 7.4 (7.2)                                                                                               |
| <b>Refinement</b>                       |                                    |                                                                                                  |                           |                                                                                                  |                                    |                                                                                                 |                                                                   |                                                                                                         |
| Resolution (Å)                          | 1.20                               | 1.20                                                                                             | 1.20                      | 1.20                                                                                             | 1.20                               | 1.20                                                                                            | 1.20                                                              | 1.20                                                                                                    |
| No. reflections                         | 72,011                             | 71,305                                                                                           | 74,561                    | 73,183                                                                                           | 73,898                             | 72,112                                                                                          | 72,478                                                            | 74,640                                                                                                  |
| $R_{\text{work}} / R_{\text{free}}$ (%) | 11.0 / 13.8                        | 11.7 / 14.8                                                                                      | 11.7 / 14.1               | 11.3 / 14.2                                                                                      | 11.1 / 13.1                        | 10.3 / 12.7                                                                                     | 12.0 / 15.0                                                       | 11.4 / 13.9                                                                                             |
| No. atoms                               |                                    |                                                                                                  |                           |                                                                                                  |                                    |                                                                                                 |                                                                   |                                                                                                         |
| Protein                                 | 4,285                              | 4,256                                                                                            | 4,253                     | 4,245                                                                                            | 4,253                              | 4,245                                                                                           | 4,259                                                             | 4,240                                                                                                   |
| Ligand/ion                              | 1 glycerol                         | 2 CO <sub>2</sub> ,<br>1 glycerol                                                                | 1 glycerol                | 2 CO <sub>2</sub> ,<br>1 glycerol                                                                | 1 glycerol                         | 2 CO <sub>2</sub> ,<br>1 glycerol                                                               | 1 HCO <sub>3</sub> <sup>-</sup> ,<br>1 glycerol                   | 1 HCO <sub>3</sub> <sup>-</sup> ,<br>1 CO <sub>2</sub> ,<br>1 glycerol                                  |
| Water                                   | 371                                | 373                                                                                              | 263                       | 367                                                                                              | 264                                | 365                                                                                             | 283                                                               | 333                                                                                                     |
| <b>B-factors</b>                        |                                    |                                                                                                  |                           |                                                                                                  |                                    |                                                                                                 |                                                                   |                                                                                                         |
| Protein<br>(main / side chain)          | 9.78 / 12.75                       | 11.48 / 14.38                                                                                    | 10.09 / 13.22             | 10.80 / 13.62                                                                                    | 7.90 / 10.99                       | 8.87 / 11.51                                                                                    | 10.84 / 14.07                                                     | 10.31 / 13.31                                                                                           |
| Ligand/ion                              | 20.76<br>(glycerol)                | 13.90<br>(first CO <sub>2</sub> ),<br>26.78<br>(second CO <sub>2</sub> ),<br>18.39<br>(glycerol) | 18.32<br>(glycerol)       | 10.63<br>(first CO <sub>2</sub> ),<br>23.50<br>(second CO <sub>2</sub> ),<br>17.17<br>(glycerol) | 14.79<br>(glycerol)                | 8.80<br>(first CO <sub>2</sub> ),<br>21.13<br>(second CO <sub>2</sub> ),<br>14.78<br>(glycerol) | 11.23<br>(HCO <sub>3</sub> <sup>-</sup> ),<br>24.46<br>(glycerol) | 9.25<br>(HCO <sub>3</sub> <sup>-</sup> ),<br>23.17<br>(second CO <sub>2</sub> ),<br>21.27<br>(glycerol) |
| Water                                   | 30.25                              | 30.67                                                                                            | 26.12                     | 30.58                                                                                            | 24.33                              | 27.75                                                                                           | 27.41                                                             | 29.71                                                                                                   |
| <b>R.m.s. deviations</b>                |                                    |                                                                                                  |                           |                                                                                                  |                                    |                                                                                                 |                                                                   |                                                                                                         |
| Bond lengths (Å)                        | 0.031                              | 0.030                                                                                            | 0.029                     | 0.028                                                                                            | 0.029                              | 0.028                                                                                           | 0.031                                                             | 0.028                                                                                                   |
| Bond angles (°)                         | 2.515                              | 2.435                                                                                            | 2.437                     | 2.423                                                                                            | 2.506                              | 2.368                                                                                           | 2.644                                                             | 2.284                                                                                                   |
| Partial occupancy (%)                   |                                    |                                                                                                  |                           |                                                                                                  |                                    |                                                                                                 |                                                                   |                                                                                                         |
| His64 (out/in)<br>conformation (%)      | 58 / 42                            | 44 / 56                                                                                          | 40 / 60                   | 69 / 31                                                                                          | 32 / 68                            | 63 / 37                                                                                         | 49 / 51                                                           | 68 / 32                                                                                                 |
|                                         | Co-CA II<br>0atm<br>pH11.0<br>6LV3 | Co-CA II<br>20atm<br>pH11.0<br>6LV4                                                              | Ni-CA II<br>0atm<br>6LV5  | Ni-CA II<br>20atm<br>6LV6                                                                        | Ni-CA II<br>0atm<br>pH11.0<br>6LV7 | Ni-CA II<br>20atm<br>pH11.0<br>6LV8                                                             | Cu-CA II<br>0atm<br>6LV9                                          | Cu-CA II<br>20atm<br>6LVA                                                                               |
| <b>Data collection</b>                  |                                    |                                                                                                  |                           |                                                                                                  |                                    |                                                                                                 |                                                                   |                                                                                                         |
| Space group                             | $P2_1$                             | $P2_1$                                                                                           | $P2_1$                    | $P2_1$                                                                                           | $P2_1$                             | $P2_1$                                                                                          | $P2_1$                                                            | $P2_1$                                                                                                  |
| Cell dimensions                         |                                    |                                                                                                  |                           |                                                                                                  |                                    |                                                                                                 |                                                                   |                                                                                                         |
| $a, b, c$ (Å)                           | 42.33,<br>41.26,<br>72.08          | 42.36,<br>41.46,<br>72.31                                                                        | 42.40,<br>41.29,<br>71.92 | 42.40,<br>41.37,<br>72.13                                                                        | 42.52,<br>41.23,<br>71.87          | 42.42,<br>41.40,<br>72.19                                                                       | 42.33,<br>41.23,<br>72.09                                         | 42.36,<br>41.40,<br>72.31                                                                               |
| $\beta$ (°)                             | 104.13                             | 104.02                                                                                           | 104.03                    | 104.01                                                                                           | 104.06                             | 104.04                                                                                          | 104.17                                                            | 103.97                                                                                                  |
| Resolution (Å)                          | 30-1.20<br>(1.22-1.20)             | 30-1.20<br>(1.22-1.20)                                                                           | 30-1.20<br>(1.22-1.20)    | 30-1.20<br>(1.22-1.20)                                                                           | 30-1.20<br>(1.22-1.20)             | 30-1.20<br>(1.22-1.20)                                                                          | 30-1.20<br>(1.22-1.20)                                            | 30-1.20<br>(1.22-1.20)                                                                                  |
| $R_{\text{sym}}$ (%)                    | 8.5 (46.4)                         | 5.8 (42.4)                                                                                       | 8.6 (33.1)                | 7.2 (37.7)                                                                                       | 8.5 (29.7)                         | 4.7 (22.7)                                                                                      | 9.9 (42.8)                                                        | 7.8 (44.8)                                                                                              |
| $I/\sigma(I)$                           | 23.0 (4.3)                         | 31.8 (5.6)                                                                                       | 20.7 (7.6)                | 23.1 (7.2)                                                                                       | 23.1 (8.4)                         | 40.6 (10.1)                                                                                     | 19.5 (6.0)                                                        | 25.3 (5.5)                                                                                              |
| Completeness (%)                        | 95.0 (91.7)                        | 94.6 (91.2)                                                                                      | 96.6 (93.8)               | 95.4 (92.1)                                                                                      | 97.5 (94.7)                        | 96.1 (93.0)                                                                                     | 95.1 (92.3)                                                       | 96.9 (94.3)                                                                                             |
| Redundancy                              | 7.6 (7.7)                          | 7.6 (7.6)                                                                                        | 7.5 (7.4)                 | 7.6 (7.5)                                                                                        | 7.4 (7.3)                          | 7.5 (7.3)                                                                                       | 7.7 (7.6)                                                         | 7.5 (7.5)                                                                                               |



| <b>Refinement</b>                       |                     |                                                                                                                                                |                     |                                                                                                         |                     |                                                                                                         |                     |                                                            |
|-----------------------------------------|---------------------|------------------------------------------------------------------------------------------------------------------------------------------------|---------------------|---------------------------------------------------------------------------------------------------------|---------------------|---------------------------------------------------------------------------------------------------------|---------------------|------------------------------------------------------------|
| Resolution (Å)                          | 1.20                | 1.20                                                                                                                                           | 1.20                | 1.20                                                                                                    | 1.20                | 1.20                                                                                                    | 1.20                | 1.20                                                       |
| No. reflections                         | 71,822              | 72,158                                                                                                                                         | 73,007              | 72,507                                                                                                  | 73,791              | 73,217                                                                                                  | 71,843              | 73,841                                                     |
| $R_{\text{work}} / R_{\text{free}}$ (%) | 12.3 / 14.9         | 11.3 / 13.9                                                                                                                                    | 11.6 / 14.1         | 11.2 / 13.8                                                                                             | 11.7 / 13.9         | 11.2 / 13.6                                                                                             | 11.7 / 14.4         | 11.3 / 14.2                                                |
| No. atoms                               |                     |                                                                                                                                                |                     |                                                                                                         |                     |                                                                                                         |                     |                                                            |
| Protein                                 | 4,252               | 4,240                                                                                                                                          | 4,259               | 4,240                                                                                                   | 4,259               | 4,240                                                                                                   | 4,259               | 4,240                                                      |
| Ligand/ion                              | 1 glycerol          | 1 HCO <sub>3</sub> <sup>-</sup> ,<br>2 CO <sub>2</sub> ,<br>1 glycerol                                                                         | 1 glycerol          | 1 HCO <sub>3</sub> <sup>-</sup> ,<br>1 CO <sub>2</sub> ,<br>1 glycerol                                  | 1 glycerol          | 1 HCO <sub>3</sub> <sup>-</sup> ,<br>1 CO <sub>2</sub> ,<br>1 glycerol                                  | 1 glycerol          | 1 CO <sub>2</sub> ,<br>1 glycerol                          |
| Water                                   | 265                 | 333                                                                                                                                            | 279                 | 347                                                                                                     | 279                 | 346                                                                                                     | 286                 | 360                                                        |
| <i>B</i> -factors                       |                     |                                                                                                                                                |                     |                                                                                                         |                     |                                                                                                         |                     |                                                            |
| Protein<br>(main / side chain)          | 10.84 / 14.06       | 10.39 / 13.16                                                                                                                                  | 8.73 / 11.74        | 7.93 / 10.50                                                                                            | 9.15 / 12.17        | 8.38 / 10.83                                                                                            | 9.71 / 12.55        | 8.23 / 10.89                                               |
| Ligand/ion                              | 21.51<br>(glycerol) | 15.78<br>(HCO <sub>3</sub> <sup>-</sup> ),<br>14.19<br>(first CO <sub>2</sub> ),<br>21.78<br>(second CO <sub>2</sub> ),<br>19.39<br>(glycerol) | 18.86<br>(glycerol) | 9.15<br>(HCO <sub>3</sub> <sup>-</sup> ),<br>21.92<br>(second CO <sub>2</sub> ),<br>14.87<br>(glycerol) | 19.13<br>(glycerol) | 7.40<br>(HCO <sub>3</sub> <sup>-</sup> ),<br>21.95<br>(second CO <sub>2</sub> ),<br>13.93<br>(glycerol) | 17.19<br>(glycerol) | 19.67<br>(second CO <sub>2</sub> ),<br>14.81<br>(glycerol) |
| Water                                   | 26.98               | 28.72                                                                                                                                          | 24.56               | 26.58                                                                                                   | 26.51               | 26.38                                                                                                   | 26.62               | 29.36                                                      |
| R.m.s. deviations                       |                     |                                                                                                                                                |                     |                                                                                                         |                     |                                                                                                         |                     |                                                            |
| Bond lengths (Å)                        | 0.031               | 0.028                                                                                                                                          | 0.032               | 0.029                                                                                                   | 0.030               | 0.028                                                                                                   | 0.031               | 0.029                                                      |
| Bond angles (°)                         | 2.484               | 2.358                                                                                                                                          | 2.600               | 2.382                                                                                                   | 2.552               | 0.352                                                                                                   | 2.550               | 2.460                                                      |
| Partial occupancy (%)                   |                     |                                                                                                                                                |                     |                                                                                                         |                     |                                                                                                         |                     |                                                            |
| His64 (out/in)<br>conformation (%)      | 49 / 51             | 69 / 31                                                                                                                                        | 43 / 57             | 60 / 40                                                                                                 | 46 / 54             | 52 / 48                                                                                                 | 39 / 61             | 66 / 34                                                    |

\*Values in parentheses are for the highest-resolution shell.

**Supplementary Table 2. List of key bound water molecules in the CA II structures.**

|                               | apo-CA<br>II<br>0atm<br>6LUU | apo-CA<br>II<br>20atm<br>6LUV | Zn-CA<br>II<br>0atm<br>6LUW | Zn-CA<br>II<br>20atm<br>6LUX | Co-CA<br>II<br>0atm<br>pH11.0<br>6LV3 | Co-CA<br>II<br>20atm<br>6LV2 | Ni-CA<br>II<br>0atm<br>6LV5 | Ni-CA<br>II<br>20atm<br>6LV6 | Cu-CA<br>II<br>0atm<br>6LV9 | Cu-CA<br>II<br>20atm<br>6LVA |
|-------------------------------|------------------------------|-------------------------------|-----------------------------|------------------------------|---------------------------------------|------------------------------|-----------------------------|------------------------------|-----------------------------|------------------------------|
| CO <sub>2</sub>               | –                            | A 302                         |                             | A 302                        | –                                     |                              | –                           |                              | –                           | –                            |
| HCO <sub>3</sub> <sup>–</sup> | –                            | –                             |                             |                              | –                                     | A 304                        | –                           | A 305                        | –                           | –                            |
| W <sub>Zn</sub>               | –                            | –                             | A 481                       | A 426                        | –                                     |                              | –                           | –                            | –                           | –                            |
| W <sub>Co, tetra</sub>        | –                            | –                             | –                           | –                            | A 490                                 |                              | –                           | –                            | –                           | –                            |
| W <sub>Co, octa</sub>         | –                            | –                             | –                           | –                            | –                                     | A 485                        | –                           | –                            | –                           | –                            |
| W <sub>Ni</sub>               | –                            | –                             | –                           | –                            | –                                     | –                            | A 573                       | A 583                        | –                           | –                            |
| W <sub>Ni'</sub>              | –                            | –                             | –                           | –                            | –                                     | –                            | A 421                       | –                            | –                           | –                            |
| W <sub>Ni''</sub>             | –                            | –                             | –                           | –                            | –                                     | –                            | A 602                       | –                            | –                           | –                            |
| W <sub>Cu</sub>               | –                            | –                             | –                           | –                            | –                                     | –                            | –                           | –                            | A 451                       | A 421                        |
| W <sub>Cu'</sub>              | –                            | –                             | –                           | –                            | –                                     | –                            | –                           | –                            | A 580                       | –                            |
| W <sub>apo</sub>              | A 486                        | A 475                         |                             | –                            | –                                     | –                            | –                           | –                            | –                           | –                            |
| W <sub>DW</sub>               | A 618                        | –                             | A 581                       | –                            | A 569                                 | –                            | –                           | –                            | A 587                       | A 496                        |
| W <sub>DW'</sub>              | –                            | –                             | –                           | –                            | –                                     | –                            | –                           | –                            | –                           | A 695                        |
| W <sub>DW''</sub>             | –                            | –                             | –                           | –                            | –                                     | –                            | –                           | –                            | –                           | A 675                        |
| W <sub>I</sub>                | –                            | A 591                         | –                           | A 483                        | –                                     | A 448                        | A 611                       | A 495                        | –                           | A 427                        |
| W <sub>I'</sub>               | –                            | –                             | –                           | A 643                        | –                                     | –                            | –                           | –                            | –                           | A 663                        |
| W <sub>I</sub>                | A 591                        | –                             | A 487                       |                              | A 546                                 | –                            | –                           | –                            | A 563                       |                              |
| W <sub>2</sub>                | A 641                        | A 666                         | A 615                       | A 678                        | A 584                                 | A 667                        | A 627                       | A 662                        | A 636                       | A 681                        |
| W <sub>2'</sub>               | –                            | –                             | –                           | A 401                        | –                                     | A 401                        | –                           | –                            | –                           | A 401                        |
| W <sub>3a</sub>               | A 541                        | A 556                         | A 518                       | A 543                        | A 529                                 | A 537                        | A 532                       | A 507                        | A 540                       | A 528                        |
| W <sub>3b</sub>               | A 462                        | A 430                         | A 451                       | A 451                        | A 454                                 | A 432                        | A 453                       | A 479                        | A 442                       | A 452                        |
| W <sub>3b'</sub>              | –                            | –                             | –                           | A 695                        | –                                     | –                            | –                           | –                            | –                           | A 684                        |
| W <sub>3bapo'</sub>           | –                            | A 606                         | –                           | –                            | –                                     | –                            | –                           | –                            | –                           | –                            |
| W <sub>3bapo'</sub>           | –                            | A 703                         | –                           | –                            | –                                     | –                            | –                           | –                            | –                           | –                            |
| W <sub>3bCo</sub>             | –                            | –                             | –                           | –                            | –                                     | A 648                        | –                           | –                            | –                           | –                            |
| W <sub>EC1</sub>              | A 680                        | –                             | A 614                       | A 665                        | A 611                                 | A 630                        | –                           | –                            | A 619                       | A 648                        |
| W <sub>EC1'</sub>             | –                            | –                             | –                           | A 702                        | –                                     | –                            | –                           | –                            | –                           | A 699                        |
| W <sub>EC1''</sub>            | –                            | –                             | –                           | –                            | –                                     | –                            | A 598                       | A 626                        | –                           | –                            |
| W <sub>EC2</sub>              | A 668                        | A 700                         | A 608                       | –                            | A 609                                 | –                            | –                           | –                            | A 603                       | A 641                        |
| W <sub>EC2'</sub>             | –                            | –                             | –                           | A 697                        | –                                     | A 661                        | A 649                       | A 669                        | –                           | A 697                        |
| W <sub>EC2''</sub>            | –                            | –                             | –                           | –                            | –                                     | –                            | A 613                       | A 642                        | –                           | –                            |
| W <sub>EC2'''</sub>           | –                            | –                             | –                           | –                            | –                                     | A 673                        | –                           | –                            | –                           | –                            |
| W <sub>EC3</sub>              | A 707                        | A 712                         | A 634                       | A 720                        | A 639                                 | A 706                        | A 658                       | A 704                        | A 649                       | A 703                        |
| W <sub>EC3'</sub>             | –                            | A 714                         | –                           | –                            | –                                     | –                            | –                           | –                            | –                           | –                            |
| W <sub>EC3''</sub>            | –                            | A 710                         | –                           | –                            | –                                     | –                            | –                           | –                            | –                           | –                            |
| W <sub>EC4</sub>              | A 761                        | A 760                         | A 655                       | A 755                        | A 660                                 | A 720                        | A 672                       | A 734                        | A 676                       |                              |
| W <sub>EC5</sub>              | A 447                        | A 421                         | A 438                       | A 417                        | A 437                                 | A 430                        | A 442                       | A 428                        | A 420                       | A 502                        |

**Supplementary Table 3. Distance geometry (Å) of CO<sub>2</sub>, HCO<sub>3</sub><sup>-</sup> and key bound water molecules in the CA II structures.**

|                                                               | apo-<br>CA II<br>0atm<br>6LUU | apo-<br>CA II<br>20atm<br>6LUV | Zn-CA<br>II<br>0atm<br>6LUW | Zn-CA<br>II<br>20atm<br>6LUX | Co-CA<br>II<br>0atm<br>pH11.0<br>6LV3 | Co-CA<br>II<br>20atm<br>6LV2 | Ni-CA<br>II<br>0atm<br>6LV5 | Ni-CA<br>II<br>20atm<br>6LV6 | Cu-CA<br>II<br>0atm<br>6LV9 | Cu-CA<br>II<br>20atm<br>6LVA |
|---------------------------------------------------------------|-------------------------------|--------------------------------|-----------------------------|------------------------------|---------------------------------------|------------------------------|-----------------------------|------------------------------|-----------------------------|------------------------------|
| Zn – W <sub>Zn</sub>                                          | –                             | –                              | 1.88                        | 1.92                         | –                                     | –                            | –                           | –                            | –                           | –                            |
| Zn – CO <sub>2</sub> (O1)                                     | –                             | –                              | –                           | 3.31                         | –                                     | –                            | –                           | –                            | –                           | –                            |
| Co – W <sub>Co, tetra</sub>                                   | –                             | –                              | –                           | –                            | 1.72                                  | –                            | –                           | –                            | –                           | –                            |
| Co – W <sub>Co, octa</sub>                                    | –                             | –                              | –                           | –                            | –                                     | 2.03                         | –                           | –                            | –                           | –                            |
| Co – CO <sub>2</sub> (O1)                                     | –                             | –                              | –                           | –                            | –                                     | –                            | –                           | –                            | –                           | –                            |
| Co – HCO <sub>3</sub> <sup>-</sup> (O1)                       | –                             | –                              | –                           | –                            | –                                     | 2.07                         | –                           | –                            | –                           | –                            |
| Co – HCO <sub>3</sub> <sup>-</sup> (O3)                       | –                             | –                              | –                           | –                            | –                                     | 2.02                         | –                           | –                            | –                           | –                            |
| Ni – W <sub>Ni</sub>                                          | –                             | –                              | –                           | –                            | –                                     | –                            | 2.09                        | 2.13                         | –                           | –                            |
| Ni – W <sub>Ni'</sub>                                         | –                             | –                              | –                           | –                            | –                                     | –                            | 2.14                        | –                            | –                           | –                            |
| Ni – W <sub>Ni''</sub>                                        | –                             | –                              | –                           | –                            | –                                     | –                            | 2.22                        | –                            | –                           | –                            |
| Ni – HCO <sub>3</sub> <sup>-</sup> (O1)                       | –                             | –                              | –                           | –                            | –                                     | –                            | –                           | 2.16                         | –                           | –                            |
| Ni – HCO <sub>3</sub> <sup>-</sup> (O3)                       | –                             | –                              | –                           | –                            | –                                     | –                            | –                           | 2.18                         | –                           | –                            |
| Cu – W <sub>Cu</sub>                                          | –                             | –                              | –                           | –                            | –                                     | –                            | –                           | –                            | 2.17                        | 2.26                         |
| Cu – W <sub>Cu'</sub>                                         | –                             | –                              | –                           | –                            | –                                     | –                            | –                           | –                            | 2.36                        | –                            |
| Cu – W <sub>DW''</sub>                                        | –                             | –                              | –                           | –                            | –                                     | –                            | –                           | –                            | –                           | 3.14                         |
| CO <sub>2</sub> (C1) – W <sub>Zn</sub>                        | –                             | –                              | –                           | 2.87                         | –                                     | –                            | –                           | –                            | –                           | –                            |
| CO <sub>2</sub> (C1) –<br>W <sub>Co, tetra</sub>              | –                             | –                              | –                           | –                            | –                                     | –                            | –                           | –                            | –                           | –                            |
| HCO <sub>3</sub> <sup>-</sup> (O1) –<br>W <sub>Co, octa</sub> | –                             | –                              | –                           | –                            | –                                     | 2.85                         | –                           | –                            | –                           | –                            |
| HCO <sub>3</sub> <sup>-</sup> (O3) –<br>W <sub>Co, octa</sub> | –                             | –                              | –                           | –                            | –                                     | 2.72                         | –                           | –                            | –                           | –                            |
| HCO <sub>3</sub> <sup>-</sup> (O1) – W <sub>Ni</sub>          | –                             | –                              | –                           | –                            | –                                     | –                            | –                           | 2.92                         | –                           | –                            |
| HCO <sub>3</sub> <sup>-</sup> (O3) – W <sub>Ni</sub>          | –                             | –                              | –                           | –                            | –                                     | –                            | –                           | 2.85                         | –                           | –                            |
| CO <sub>2</sub> (C1) – W <sub>apo</sub>                       | –                             | 2.94                           | –                           | –                            | –                                     | –                            | –                           | –                            | –                           | –                            |
| W <sub>Zn</sub> – W <sub>DW</sub>                             | –                             | –                              | 2.58                        | –                            | –                                     | –                            | –                           | –                            | –                           | –                            |
| W <sub>Zn</sub> – W1                                          | –                             | –                              | 2.63                        | –                            | –                                     | –                            | –                           | –                            | –                           | –                            |
| W <sub>Zn</sub> – W <sub>I</sub>                              | –                             | –                              | –                           | 2.75                         | –                                     | –                            | –                           | –                            | –                           | –                            |
| W <sub>Zn</sub> – W2                                          | –                             | –                              | 4.41                        | 4.65                         | –                                     | –                            | –                           | –                            | –                           | –                            |
| W <sub>Co, tetra</sub> – W <sub>DW</sub>                      | –                             | –                              | –                           | –                            | 2.61                                  | –                            | –                           | –                            | –                           | –                            |
| W <sub>Co, tetra</sub> – W1                                   | –                             | –                              | –                           | –                            | 2.73                                  | –                            | –                           | –                            | –                           | –                            |
| W <sub>Co, tetra</sub> – W <sub>I</sub>                       | –                             | –                              | –                           | –                            | –                                     | –                            | –                           | –                            | –                           | –                            |
| W <sub>Co, tetra</sub> – W2                                   | –                             | –                              | –                           | –                            | 4.55                                  | –                            | –                           | –                            | –                           | –                            |
| W <sub>Co, octa</sub> – W1                                    | –                             | –                              | –                           | –                            | –                                     | 2.75                         | –                           | –                            | –                           | –                            |
| W <sub>Co, octa</sub> – W2                                    | –                             | –                              | –                           | –                            | –                                     | 2.71                         | –                           | –                            | –                           | –                            |
| W <sub>Co, octa</sub> – W2'                                   | –                             | –                              | –                           | –                            | –                                     | 4.90                         | –                           | –                            | –                           | –                            |
| W <sub>Ni</sub> – W <sub>Ni'</sub>                            | –                             | –                              | –                           | –                            | –                                     | –                            | 2.82                        | –                            | –                           | –                            |
| W <sub>Ni</sub> – W <sub>Ni''</sub>                           | –                             | –                              | –                           | –                            | –                                     | –                            | 3.08                        | –                            | –                           | –                            |
| W <sub>Ni'</sub> – W <sub>Ni''</sub>                          | –                             | –                              | –                           | –                            | –                                     | –                            | 2.78                        | –                            | –                           | –                            |
| W <sub>Ni</sub> – W <sub>I</sub>                              | –                             | –                              | –                           | –                            | –                                     | –                            | 2.95                        | 2.88                         | –                           | –                            |
| W <sub>Ni</sub> – W2                                          | –                             | –                              | –                           | –                            | –                                     | –                            | 2.73                        | 2.68                         | –                           | –                            |
| W <sub>Cu</sub> – W1                                          | –                             | –                              | –                           | –                            | –                                     | –                            | –                           | –                            | 2.54                        | –                            |
| W <sub>Cu</sub> – W <sub>Cu'</sub>                            | –                             | –                              | –                           | –                            | –                                     | –                            | –                           | –                            | 3.06                        | –                            |

|                                                  |      |      |      |      |      |      |      |      |      |      |
|--------------------------------------------------|------|------|------|------|------|------|------|------|------|------|
| W <sub>Cu</sub> – W <sub>DW</sub>                | –    | –    | –    | –    | –    | –    | –    | –    | 3.23 | 2.84 |
| W <sub>Cu'</sub> – W <sub>DW</sub>               | –    | –    | –    | –    | –    | –    | –    | –    | 2.84 | –    |
| W <sub>DW</sub> – W <sub>DW'</sub>               | –    | –    | –    | –    | –    | –    | –    | –    | –    | 1.52 |
| W <sub>DW'</sub> – W <sub>DW''</sub>             | –    | –    | –    | –    | –    | –    | –    | –    | –    | 1.60 |
| W <sub>Cu</sub> – W <sub>I</sub>                 | –    | –    | –    | –    | –    | –    | –    | –    | –    | 2.84 |
| W <sub>Cu</sub> – W <sub>2</sub>                 | –    | –    | –    | –    | –    | –    | –    | –    | 3.44 | 3.90 |
| W <sub>apo</sub> – W <sub>DW</sub>               | 2.71 | –    | –    | –    | –    | –    | –    | –    | –    | –    |
| W <sub>apo</sub> – W <sub>1</sub>                | 2.82 | –    | –    | –    | –    | –    | –    | –    | –    | –    |
| W <sub>apo</sub> – W <sub>I</sub>                | –    | 2.88 | –    | –    | –    | –    | –    | –    | –    | –    |
| W <sub>apo</sub> – W <sub>2</sub>                | 4.90 | 3.96 | –    | –    | –    | –    | –    | –    | –    | –    |
| W <sub>1</sub> – W <sub>2</sub>                  | 2.73 | –    | 2.74 | –    | 2.70 | –    | –    | –    | 2.78 | –    |
| W <sub>1</sub> – W <sub>1'</sub>                 | –    | –    | –    | 2.02 | –    | –    | –    | –    | –    | 2.09 |
| W <sub>2</sub> – W <sub>2'</sub>                 | –    | –    | –    | 1.43 | –    | 2.79 | –    | –    | –    | 1.51 |
| W <sub>2</sub> – W <sub>3a</sub>                 | 2.75 | 2.80 | 2.77 | 3.12 | 2.77 | 3.40 | 2.81 | 2.72 | 2.81 | 3.14 |
| W <sub>2</sub> – W <sub>3b</sub>                 | 2.72 | 2.99 | 2.73 | 2.49 | 2.68 | 2.41 | 2.95 | 3.08 | 2.79 | 2.57 |
| W <sub>2</sub> – W <sub>3b'</sub>                | –    | –    | –    | 1.68 | –    | 2.69 | –    | –    | –    | 1.65 |
| W <sub>3b</sub> – W <sub>3b'</sub>               | –    | –    | –    | 1.37 | –    | 1.86 | –    | –    | –    | 1.39 |
| Thr199(N) – HCO <sub>3</sub> <sup>-</sup> (O2)   | –    | –    | –    | –    | –    | 2.93 | –    | 3.05 | –    | –    |
| Thr199(N) – CO <sub>2</sub> (O2)                 | –    | 3.20 | –    | 3.62 | –    | –    | –    | –    | –    | –    |
| Thr199(N) – W <sub>DW</sub>                      | 2.93 | –    | 2.92 | –    | 2.90 | –    | –    | –    | 2.90 | 2.74 |
| Thr199(N) – W <sub>I</sub>                       | –    | 3.34 | –    | 3.52 | –    | 3.71 | 3.04 | 3.52 | –    | 3.68 |
| Thr199(Oγ1) – HCO <sub>3</sub> <sup>-</sup> (O3) | –    | –    | –    | –    | –    | 2.44 | –    | 2.46 | –    | –    |
| Thr199(Oγ1) – W <sub>Zn</sub>                    | –    | –    | 2.73 | 2.62 | –    | –    | –    | –    | –    | –    |
| Thr199(Oγ1) – W <sub>Co, tetra</sub>             | –    | –    | –    | –    | 2.75 | –    | –    | –    | –    | –    |
| Thr199(Oγ1) – W <sub>Co, octa</sub>              | –    | –    | –    | –    | –    | 3.75 | –    | –    | –    | –    |
| Thr199(Oγ1) – W <sub>Ni</sub>                    | –    | –    | –    | –    | –    | –    | 3.68 | 3.65 | –    | –    |
| Thr199(Oγ1) – W <sub>Ni'</sub>                   | –    | –    | –    | –    | –    | –    | 2.62 | –    | –    | –    |
| Thr199(Oγ1) – W <sub>Ni''</sub>                  | –    | –    | –    | –    | –    | –    | 5.04 | –    | –    | –    |
| Thr199(Oγ1) – W <sub>Cu</sub>                    | –    | –    | –    | –    | –    | –    | –    | –    | 2.68 | 2.61 |
| Thr199(Oγ1) – W <sub>Cu'</sub>                   | –    | –    | –    | –    | –    | –    | –    | –    | 4.37 | –    |
| Thr199(Oγ1) – W <sub>apo</sub>                   | 2.72 | 2.69 | –    | –    | –    | –    | –    | –    | –    | –    |
| Thr199(Oγ1) – Glu106(Oε1)                        | 2.60 | 2.59 | 2.61 | 2.56 | 2.62 | 2.53 | 2.91 | 2.55 | 2.61 | 2.59 |
| Glu106(Oε1) – W <sub>Zn</sub>                    | –    | –    | 4.15 | 4.01 | –    | –    | –    | –    | –    | –    |
| Glu106(Oε1) – W <sub>Co, tetra</sub>             | –    | –    | –    | –    | 4.08 | –    | –    | –    | –    | –    |
| Glu106(Oε1) – W <sub>Co, octa</sub>              | –    | –    | –    | –    | –    | 4.85 | –    | –    | –    | –    |
| Glu106(Oε1) – W <sub>Ni</sub>                    | –    | –    | –    | –    | –    | –    | 4.75 | 4.84 | –    | –    |
| Glu106(Oε1) – W <sub>Ni'</sub>                   | –    | –    | –    | –    | –    | –    | 2.78 | –    | –    | –    |
| Glu106(Oε1) – W <sub>Cu</sub>                    | –    | –    | –    | –    | –    | –    | –    | –    | 4.20 | 4.19 |

|                                    |      |      |      |      |      |      |      |      |      |      |
|------------------------------------|------|------|------|------|------|------|------|------|------|------|
| Glu106(Oε1) –<br>W <sub>apo</sub>  | 4.01 | 4.09 | –    | –    | –    | –    | –    | –    | –    | –    |
| His64 <sub>in</sub> (Nδ1) –<br>W2  | 3.02 | 3.16 | 3.22 | 3.28 | 2.94 | 3.88 | 3.29 | 3.22 | 3.43 | 3.48 |
| His64 <sub>in</sub> (Nδ1) –<br>W2' | –    | –    | –    | 1.86 | –    | 1.26 | –    | –    | –    | 1.99 |

## Supplementary References

1 Sjoebloom, B., Polentarutti, M. & Djinovic-Carugo, K. Structural study of X-ray induced activation of carbonic anhydrase. *Proc Natl Acad Sci U S A* **106**, 10609-10613, doi:10.1073/pnas.0904184106 (2009).
